# Supplementary material
Source: publisher figshare collection journal article supplement (https://diabetesjournals.figshare.com/ndownloader/files/24442823)
Supplement: Supplementary file 1 [file 24442823]

## Sheet: Table S1
	Table S1. Direct comparisons of allelic sequences within DQ4, 5, 6, 7a and 7b mixtures of haplotypes that differentiate between protective and neutral alleles. Estimated haplotype frequencies and percentages among controls, those among patients, estimated OR, Z and p-value are listed.
	A) DQ4 cluster		Control1	Patient1	OR	Z	p2		α22	α135	α150	β(-18)	β9	β13	β26	β45	β55	β56	β66	β67	β70	β71	β74	β75	β167	β185
	1	*04:04-*04:02	1 (0.08)	1 (0.05)					Y	T	H4	V	F	G	G	G	R	L	D	I	E	D	S	V	R	I3
	2	*04:01-*04:02	51 (4.01)	72 (3.74)	0.93	-0.39	0.69978		Y	T	Y	V	F	G	G	G	R	L	D	I	E	D	S	V	R	I
	3	*04:02-*04:02	3 (0.24)	4 (0.21)	0.88	-0.17	0.86846		Y	I	Y	V	F	G	G	G	R	L	D	I	E	D	S	V	R	I
	4	*04:01-*03:03	1 (0.08)						Y	T	Y	V	Y	G	L	G	P	P	E	V	R	T	E	L	R	I
	5	*06:01-*03:01	6 (0.47)5						F	T	Y	A	Y	A	Y	E	P	P	E	V	R	T	E	L	H	T
	B) DQ5 cluster								α(-7)	αb1	α31	α196	α204	β30	β57	β66	β67	β70	β71	β126
	1	*01:04-*05:03	8 (0.63)	1 (0.05)	0.08	-2.73	0.0063779		M	G	E	T	V	H	D	E	V	G	A	Q
	2	*01:01-*05:03	18 (1.42)	3 (0.16)	0.11	-4.33	1.5111e-05		V	D	E	A	V	H	D	E	V	G	A	Q
	3	*01:07-*05:03	2 (0.16)	1 (0.05)					V	D	E	A	V	H	D	E	V	G	A	Q
	4	*01:05-*05:01	1 (0.08)						M	G	E	A	V	H	V	E	V	G	A	Q
	5	*01:01-*05:01	146 (11.48)	180 (9.36)	0.82	-1.94	0.051799		V	D	E	A	V	H	V	E	V	G	A	Q
	6	*01:02-*05:02	16 (1.26)	15 (0.78)	0.62	-1.36	0.1748		V	D	Q	A	M	H	S	E	V	G	A	H
	7	*01:02-*05:01	3 (0.24)						V	D	Q	A	M	H	V	E	V	G	A	Q
	8	*01:02-*05:04	3 (0.24)	2 (0.10)					V	D	Q	A	M	Y	S	D	I	E	D	H
	C) DQ6 cluster								α22	α38	α81	α126	α127	α204	β(-21)	β(-18)	β(-17)	β(-6)	β(-5)	β(-4)	β3	β9	β13	β26	β30	β37	β38	β57	β66	β67	β70	β86	β87	β130	β167	β197	β203
	1	*01:02-*06:14	1 (0.08)						Y	R	A	Q	S	M	D	V	A	S	L	L	S	F	G	L	H	Y	A	D	E	V	G	A	F	R	R	S	V
	2	*01:02-*06:02	201 (15.8)	8 (0.42)	0.03	-16.39	2.2471e-60		Y	R	A	Q	S	M	D	V	A	S	L	L	S	F	G	L	Y	Y	A	D	E	V	G	A	F	R	R	S	V
	3	*01:02-*06:03	5 (0.39)	1 (0.05)	0.13	-2.18	0.029064		Y	R	A	Q	S	M	D	V	A	S	L	L	S	Y	G	L	H	Y	A	D	E	V	G	A	F	R	R	S	V
	4	*01:02-*06:09	2 (0.16)	6 (0.31)	1.98	0.86	0.39126		Y	R	A	Q	S	M	D	V	A	S	L	L	S	Y	G	L	Y	Y	A	V	E	V	R	G	Y	Q	R	S	V
	5	*01:02-*06:04	52 (4.09)	80 (4.16)	1.02	0.1	0.92206		Y	R	A	Q	S	M	D	V	A	S	L	L	S	Y	G	L	H	Y	A	V	E	V	R	G	Y	Q	R	S	V
	6	*01:10-*06:03	1 (0.08)						F	K	T	H	A	V	D	V	A	S	L	L	S	Y	G	L	H	Y	A	D	E	V	G	A	F	R	R	S	V
	7	*01:03-*06:03	91 (7.15)	39 (2.03)	0.28	-7.28	3.3672e-13		F	K	A	H	A	V	D	V	A	S	L	L	S	Y	G	L	H	Y	A	D	E	V	G	A	F	R	R	S	V
	8	*01:03-*06:01	9 (0.71)	1 (0.05)	0.07	-3.25	0.0011406		F	K	A	H	A	V	G	A	P	T	P	V	P	L	A	Y	Y	D	V	D	D	I	R	A	F	R	H	N	I
	D) DQ7a cluster								α(-6)	α157	β57
	1	*03:02-*03:04	3 (0.24)	4 (0.21)	0.88	-0.17	0.86846		T	D	A
	2	*03:03-*03:01	56 (4.4)	59 (3.07)	0.7	-1.92	0.055094		M	D	D
	3	*03:01-*03:01	7 (0.55)						M	A	D
	4	*03:01-*03:04	1 (0.08)						M	A	A
	E) DQ7b cluster								α(-13)	α(-1)	α74	α157	β(-18)	β13	β26	β45	β57	β167	β168	β169	β170	β185
	1	*05:01-*03:02		1 (0.05)					A	E	I	A	V	G	L	G	A	R	G	D	V	I
	2	*05:05-*03:02	1 (0.08)	2 (0.10)					T	E	I	A	V	G	L	G	A	R	G	D	V	I
	3	*05:05-*03:09	1 (0.08)						T	E	I	A	A	A	Y	E	D	H	A	V	-	T
	4	*05:09-*03:01	1 (0.08)						T	K	I	A	A	A	Y	E	D	H	G	D	V	T
	5	*05:05-*03:01	126 (9.91)	39 (2.03)	0.2	-9.63	6.2394e-22		T	E	I	A	A	A	Y	E	D	H	G	D	V	T
	6	*05:05-*03:19	3 (0.24)	1 (0.05)					T	E	I	A	A	A	Y	E	D	H	G	D	V	I
	7	*05:03-*03:01	7 (0.55)						A	E	I	S	A	A	Y	E	D	H	G	D	V	T
	8	*05:10-*03:01	1 (0.08)						A	E	V	A	A	A	Y	E	D	H	G	D	V	T
	1) A frequency is highlighted red only if it has more than 5 copies and appears only among controls.
	2) Protective haplotypes are highlighted red, at the significance level of 5%.
	3) Neutrally associated haplotypes are in black font, while those with fewer than 3 subjects are colored gray
	4) residues are colored blue, if they were monomorphic among those relatively common DQ haplotypes
	5) The haplotype and frequency are highlighted red, if they occur only among controls with at least 5 copies

## Sheet: Table S2
		Table S2. T1D associations with individual residues within clusters of respectively DQ4, DQ5, DQ6, DQ7a and DQ7b haplotypes. DQ4 cluster has 17 polymorphics residues, represented by three LD sets : ( β9, β26, β55, β56, β66, β67, β70, β71, β74, β75), (α22, β(-18), β13, β45, β167, β185) and α135. DQ5 cluster has 12 plymorphic residues, represented by (α(-7), αb1), (α31, α204), α196, (β30, β66, β67,…
		ID	AA1		Control	Patient1	OR	Z	p3	Fisher's4		ID	AA		Control1	Patient1	OR	Z	p	Fisher's
		A) Carriers of DQ4										C) Carriers of DQ6
		1	α135	I	3 (0.24)	4 (0.21)	0.88	-0.17	0.86846	1		1	α22	F	101 (7.94)	40 (2.08)	0.26	-8.02	1.0171e-15	0.737539
				T	59 (4.64)	73 (3.79)	0.82	-1.18	0.2377					Y	261 (20.52)	95 (4.94)	0.24	-13.24	4.8339e-40
		2	β9	F	55 (4.32)	77 (4.00)	0.93	-0.45	0.65262	0.00288252			DQ6_1: α22F/Y, α38K/R, α126H/Q, α127A/S, α204V/M
				Y	7 (0.55)2							2	β3	P	9 (0.71)	1 (0.05)	0.07	-3.25	0.0011406	0.299654
			DQ4_1 ( β9Y/F, β26L|Y/G, β55P/R, β56P/L, β66E/D, β67V/I,											S	353 (27.75)	134 (6.96)	0.25	-15.56	1.2921e-54
			β70R/E, β71T/D, β74E/S, β75L/V)										DQ6_2: β3P/S, β(-21)G/D, β(-18)A/V, β(-17)P/A, β(-6)T/S, β(-5)P/L,
		3	β13	A	6 (0.47)					0.00684598			β(-4)V/L, β13A/G, β26Y/L, β37D/Y, β38V/A, β66D/E, β67I/V,
				G	56 (4.40)	77 (4.00)	0.91	-0.56	0.57669				β167H/R, β197N/S, β203I/V
			DQ4_2 (α22F/Y, β(-18)AV, β13A/G, β45E/G, β167H/R, β185T/I)									3	β9	F	202 (15.88)	8 (0.42)	0.03	-16.45	8.9832e-61	4.14549e-28
														L	9 (0.71)	1 (0.05)	0.07	-3.25	0.0011406
		B) Carriers of DQ5												Y	151 (11.87)	126 (6.55)	0.55	-5.36	8.1649e-08
		1	αb1	D	188 (14.78)	201 (10.45)	0.71	-3.7	0.00021884	0.00996892		4	β30	H	150 (11.79)	120 (6.24)	0.53	-5.68	1.3723e-08	4.87855e-23
				G	9 (0.71)	1 (0.05)	0.07	-2.97	0.0029943					Y	212 (16.67)	15 (0.78)	0.05	-16.22	3.5724e-59
			DQ5_1: α(-7)M/V, αb1G/D									5	β57	D	308 (24.21)	49 (2.55)	0.11	-18.14	1.6074e-73	2.38137e-25
		2	α31	E	175 (13.76)	185 (9.62)	0.7	-3.62	0.00029733	0.401207				V	54 (4.25)	86 (4.47)	1.05	0.3	0.76129
				Q	22 (1.73)	17 (0.88)	0.51	-2.15	0.031908				DQ6_3: β57V/D, β86G/A, β87Y/F, β130Q/R
			DQ5_2: α31Q/E, α204M/V									6	β70	G	299 (23.51)	48 (2.49)	0.11	-17.84	3.7423e-71	5.36387e-23
		3	α196	A	189 (14.86)	201 (10.45)	0.7	-3.76	0.00016964	0.0188416				R	63 (4.95)	87 (4.52)	0.91	-0.57	0.57141
				T	8 (0.63)	1 (0.05)	0.08	-2.73	0.0063779
		4	β57	D	28 (2.2)	5 (0.26)	0.12	-5.18	2.1679e-07	4.23616e-05		D) Carriers of DQ7a
				S	19 (1.49)	17 (0.88)	0.59	-1.61	0.10761			1	α(-6)	M	64 (5.03)	59 (3.07)	0.6	-2.84	0.0044585	0.711867
				V	150 (11.79)	180 (9.36)	0.79	-2.22	0.026151					T	3 (0.24)	4 (0.21)	0.53	-0.97	0.33285
		5	β126	H	19 (1.49)	17 (0.88)	0.59	-1.61	0.10761	0.728322		2	α157	A	8 (0.63)					0.00640032
				Q	178 (13.99)	185 (9.62)	0.69	-3.81	0.00013683					D	59 (4.64)	63 (3.27)	0.68	-2.12	0.034273
												3	β57	A	4 (0.31)	4 (0.21)	0.66	-0.59	0.55459	1
		1) we use, e.g., DQ4_1, to denote a set of residues in complete LD. At each residue, we use, e.g., β9Y/F to denote the minor /major residue.												D	63 (4.95)	59 (3.07)	0.59	-2.94	0.0032469
												E) Carriers of DQ7b
		2) The haplotype and frequency are highlighted red, if they occur only among controls with at least 5 copies										1	α(-13)	A	8 (0.63)	1 (0.05)	0.08	-3.02	0.0025518	0.687774
														T	132 (10.38)	42 (2.18)	0.21	-9.74	1.9416e-22
		3) p-value is highlighted red, at the significance level of 5%.										2	α157	A	133 (10.46)	43 (2.23)	0.21	-9.73	2.188e-22	0.201846
		4) p-value is highlighted yellow, at significance level of 5%												S	7 (0.55)

## Sheet: Table S3
			Table S3. Haplotypic association results with selected residues from both alpha chain and beta chain (αb1,α157,α196, β9, β30, β57, β70) with at least five copies of haplotypes: estimated haplotype frequency and percentage (excluding those motifs with fewer than 3 copies), estimated odds ratio, hazard score, and p-value, from association analysis with T1D in case-control study . For given haplotyp…
			Carriers1		Control2	Patient	OR	Z	p3	DQ haplotype group		αb1	α157	α196	β9	β30	β57	β70
			DQ4	a1	55 (4.32)	77 (4)	0.93	-0.45	0.65262	*04:01-*04:02~*04:02-*04:02~*04:04-*04:02		.	.	.	.	.	.	E
				a2	7 (0.55)					*04:01-*03:03~*06:01-*03:01		.	.	.	Y	.	.	R
			DQ5	b1	20 (1.57)	4 (0.21)	0.13	-4.39	1.1329e-05	*01:01-*05:03~*01:07-*05:03		.	.	.	Y	H	.	.
				b2	16 (1.26)	15 (0.78)	0.62	-1.36	0.1748	*01:02-*05:02		.	.	.	Y	H	S	.
				b3	149 (11.71)	180 (9.36)	0.8	-2.15	0.031211	*01:01-*05:01~*01:02-*05:01		.	.	.	Y	H	V	.
				b4	8 (0.63)	1 (0.05)	0.08	-2.73	0.0063779	*01:04-*05:03		G	.	T	Y	H	.	.
			DQ6	c1	201 (15.8)	8 (0.42)	0.03	-16.39	2.2471e-60	*01:02-*06:02		.	.	.	.	.	.	.
				c2	9 (0.71)	1 (0.05)	0.07	-3.25	0.0011406	*01:03-*06:01		.	.	.	L	.	.	R
				c3	97 (7.63)	40 (2.08)	0.27	-7.63	2.3033e-14	*01:02-*06:03~*01:03-*06:03~*01:10-*06:03		.	.	.	Y	H	.	.
				c4	52 (4.09)	80 (4.16)	1.02	0.1	0.92206	*01:02-*06:04		.	.	.	Y	H	V	R
				c5	2 (0.16)	6 (0.31)	1.98	0.86	0.39126	*01:02-*06:09		.	.	.	Y	.	V	R
			DQ7a	d1	7 (0.55)					*03:01-*03:01		.	.	.	Y	.	.	R
				d2	3 (0.24)	4 (0.21)	0.88	-0.17	0.86846	*03:02-*03:04		.	D	.	Y	.	A	R
				d3	56 (4.4)	59 (3.07)	0.7	-1.92	0.055094	*03:03-*03:01		.	D	.	Y	.	.	R
			DQ7b	e1	132 (10.38)	40 (2.08)	0.2	-9.91	3.6403e-23	*05:05-*03:01~*05:05-*03:09~*05:05-*03:19~*05:09-*03:01~*05:10-*03:01		.	.	.	Y	.	.	R
				e2	7 (0.55)					*05:03-*03:01		.	S	.	Y	.	.	R
			Carriers of DQ4, 5, 6, 7a and 7b	m1	56 (4.4)	77 (4)	0.91	-0.56	0.57669	*03:01-*04:02~*04:01-*04:02~*04:02-*04:02~ *04:04-*04:02		.	.	.	.	.	.	E
				m2	201 (15.8)	8 (0.42)	0.03	-16.39	2.2471e-60	*01:02-*06:02 (DQ6.2)		D	A	A	F	Y	D	G
				m3	9 (0.71)	1 (0.05)	0.07	-3.25	0.0011406	*01:03-*06:01		.	.	.	L	.	.	R
				m4	117 (9.2)	44 (2.29)	0.25	-8.86	7.72e-19	*01:01-*05:03~*01:02-*06:03~*01:03-*06:03~ *01:07-*05:03~*01:10-*06:03		.	.	.	Y	H	.	.
				m5	16 (1.26)	15 (0.78)	0.62	-1.36	0.1748	*01:02-*05:02		.	.	.	Y	H	S	.
				m6	149 (11.71)	180 (9.36)	0.8	-2.15	0.031211	*01:01-*05:01~*01:02-*05:01		.	.	.	Y	H	V	.
				m7	52 (4.09)	80 (4.16)	1.02	0.1	0.92206	*01:02-*06:04		.	.	.	Y	H	V	R
				m8	146 (11.48)	40 (2.08)	0.18	-10.89	1.3057e-27	*03:01-*03:01~*04:01-*03:03~*05:05-*03:01~ *05:05-*03:09~*05:05-*03:19~*05:09-*03:01~ *05:10-*03:01~*06:01-*03:01		.	.	.	Y	.	.	R
				m9	2 (0.16)	6 (0.31)	1.98	0.86	0.39126	*01:02-*06:09		.	.	.	Y	.	V	R
				m10	3 (0.24)	4 (0.21)	0.88	-0.17	0.86846	*03:02-*03:04		.	D	.	Y	.	A	R
				m11	56 (4.4)	59 (3.07)	0.7	-1.92	0.055094	*03:03-*03:01		.	D	.	Y	.	.	R
				m12	7 (0.55)					*05:03-*03:01		.	S	.	Y	.	.	R
				m13	8 (0.63)	1 (0.05)	0.08	-2.73	0.0063779	*01:04-*05:03		G	.	T	Y	H	.	.
			1) Alleles with fewer than 5 observed copies were excluded
			2) The haplotype and frequency are highlighted red, if they occur only among controls with at least 5 copies
			3) p-value is highlighted red, at the significance level of 5%.

## Sheet: Table S4
		Table S4. Haplotypic association results with selected residues from both alpha chain and beta chain (αb1,α157,α196, β9, β30, β57, β70): estimated haplotype frequency and percentage, estimated odds ratio, hazard score, and p-value, from association analysis with T1D (in case-control study . For given haplotypes, one or more DQA1-DQB1 haplotypes may be merged into haplotype groups. Estimated haplo…
		ID	Motif		Control	Patient	OR	Z	p	Equivalent DQ Haplotypes		αb1	α157	α196	β9	β30	β57	β70
		1	DAAFHDG		1 (0.08)					*01:02-*06:14		D	A	A	F	H	D	G
		2	DAAFYDE		56 (4.4)	77 (4)	0.91	-0.56	0.57669	*03:01-*04:02~*04:01-*04:02~*04:02-*04:02~*04:04-*04:02		D	A	A	F	Y	D	E
		3	DAAFYDG		201 (15.8)	8 (0.42)	0.03	-16.39	2.2471e-60	*01:02-*06:02 (DQ6.2)		D	A	A	F	Y	D	G
		4	DAALYDR		9 (0.71)	1 (0.05)	0.07	-3.25	0.0011406	*01:03-*06:01		D	A	A	L	Y	D	R
		5	DAAYHDG		117 (9.2)	44 (2.29)	0.25	-8.86	7.72e-19	*01:01-*05:03~*01:02-*06:03~*01:03-*06:03~*01:07-*05:03~*01:10-*06:03		D	A	A	Y	H	D	G
		6	DAAYHSG		16 (1.26)	15 (0.78)	0.62	-1.36	0.1748	*01:02-*05:02		D	A	A	Y	H	S	G
		7	DAAYHVG		149 (11.71)	180 (9.36)	0.8	-2.15	0.031211	*01:01-*05:01~*01:02-*05:01		D	A	A	Y	H	V	G
		8	DAAYHVR		52 (4.09)	80 (4.16)	1.02	0.1	0.92206	*01:02-*06:04		D	A	A	Y	H	V	R
		9	DAAYSAR		231 (18.16)	526 (27.34)	1.51	6.18	6.5425e-10	*02:01-*02:02~*05:01-*02:01~*05:05-*02:01		D	A	A	Y	S	A	R
		10	DAAYYAR		153 (12.03)	772 (40.12)	3.34	18.01	1.6033e-72	*03:01-*03:02~*03:01-*03:04~*03:01-*03:05~*05:01-*03:02~*05:05-*03:02		D	A	A	Y	Y	A	R
		11	DAAYYDR		184 (14.47)	45 (2.34)	0.16	-12.4	2.7245e-35	*02:01-*03:03~*03:01-*03:01~*03:01-*03:03~*04:01-*03:03~*05:05-*03:01~ *05:05-*03:09~*05:05-*03:19~*05:09-*03:01~*05:10-*03:01~*06:01-*03:01		D	A	A	Y	Y	D	R
		12	DAAYYSE		3 (0.24)	2 (0.1)	0.44	-0.92	0.35536	*01:02-*05:04		D	A	A	Y	Y	S	E
		13	DAAYYVR		2 (0.16)	6 (0.31)	1.98	0.86	0.39126	*01:02-*06:09		D	A	A	Y	Y	V	R
		14	DDAFYDE		2 (0.16)					*03:02-*04:02		D	D	A	F	Y	D	E
		15	DDAYSAR			6 (0.31)				*03:02-*02:02		D	D	A	Y	S	A	R
		16	DDAYYAR		13 (1.02)	73 (3.79)	3.71	4.81	1.5275e-06	*03:02-*03:02~*03:02-*03:04		D	D	A	Y	Y	A	R
		17	DDAYYDR		67 (5.27)	88 (4.57)	0.87	-0.87	0.38194	*03:02-*03:03~*03:03-*03:01		D	D	A	Y	Y	D	R
		18	DSAYYDR		7 (0.55)					*05:03-*03:01		D	S	A	Y	Y	D	R
		19	GAAYHVG		1 (0.08)					*01:05-*05:01		G	A	A	Y	H	V	G
		20	GATYHDG		8 (0.63)	1 (0.05)	0.08	-2.73	0.0063779	*01:04-*05:03		G	A	T	Y	H	D	G
